# Supplementary material for: Density control of single-walled carbon nanotubes using patterned iron nanoparticle catalysts derived from phase-separated thin films of a polyferrocene block copolymerElectronic supplementary information (ESI) available: synthesis of PS-b-PFEMS, SWNT growth and characterization. See http://www.rsc.org/suppdata/jm/b4/b403831b/
Source: Royal Society of Chemistry journal article supplement (doi:10.1039/b403831b), 2004-01-01
Supplement: b403831b.doc [file b403831b.doc]

Density Control of Single Walled Carbon Nanotubes using Patterned Iron Nanoparticle Catalysts derived from Phase Separated Thin Films of a Polyferrocene Block Copolymer

Sarah Lastella, Yung Joon Jung, Hoichang Yang, Robert Vajtai, Pulickel M. Ajayan*, Chang Y. Ryu*

and

David Rider, Ian Manners*

**Supplementary Information:**

*Synthesis of organometallic block copolymer:*

Poly(styrene-*block*-ferrocenylethylmethylsilane) (PS-*b*-PFEMS) was synthesized via the previously reported method1,2 involving the anionic polymerization of styrene followed by the addition of ethylmethylsila[1]ferrocenophane to the resulting living polymer with a methanol quench. Yield: 95% (0.404g). GPC analysis of the PS homopolymer aliquot and PS-*b*-PFEMS was Mn = 56400, PDI = 1.046 and Mn = 63700, PDI = 1.000. From 1H-NMR and PS precursor GPC results, the block copolymer has a composition corresponding to PFEMS (volume fraction, of 0.115, which correlates with the spherical domain morphology identified from AFM).

*SWNT growth:*

Thin films of PS-*b*-PFEMS were spin cast (using an acceleration rate of 2500 rpm/sec and a spin speed of 2500 rpm for 30 seconds) on silicon/native oxide and plasma grown silicon oxide (145 nm) substrates from 0.1wt%, 0.5 wt%, 1.0wt%, and 2.5wt% solutions in toluene (Mallinckrodt, 100.0%). The substrates were cleaned in piranha solution at 80°C for one hour before spin coating. The prepared substrates were then placed inside a quartz tube in the CVD system for SWNT growth. The tube was evacuated to remove any oxides and other impurities and was brought to a pressure of 500 Torr with argon flow. This pressure was maintained inside the system with a constant vacuum pull coupled with an argon flow of 89 standard cubic centimeters (sccm). Then the system was heated to the optimized SWNT growth temperature of 935°C over a period of 15 minutes. The PFEMS polymer blocks are pyrolyzed into iron nanoparticles at temperatures above 500°C. When the growth temperature of 935°C was reached, argon flow was stopped and methane was simultaneously introduced to the system at a flow rate of approximately 500 sccm. Therefore, SWNTs grew at this temperature of 935°C when methane was used as the carbon source. The vacuum pump was adjusted to maintain a pressure of 500 Torr inside the system at this methane flow rate. Methane acting as a carbon source initialized nanotube growth during this time. After 5 minutes, the methane was turned off and the system evacuated to 300 mTorr. Argon was then flowed at a rate of 89 sccm until the system has cooled below 200°C in order to prevent oxidation. The pressure was raised to atmosphere with argon before removing the grown samples from the CVD system. SWNT growth experiments were performed both with and without UV-induced PS crosslinking. Similar results were obtained in each case.

*Characterization:*

X-ray photoelectron spectroscopy (XPS Multiplex) was performed on the CVD grown samples to determine iron content on the surface. The work function was 3.1 eV, while the pass energy was 46.95 eV, operating with a magnesium source. Micro-Raman spectroscopy was performed with a Renishaw Ramascope equipped with an argon laser with an excitation line at 514 nm. Analysis was carried out at only 25% laser power to reduce rate of destruction of the SWNTs. A Jeol JSM-6330F field emission scanning electron microscope (FESEM) was used to obtain large area images of the soft lithography patterned samples. Because of the lack of high resolution, all nanotubes were imaged with atomic force microscopy. All atomic force microscopy (AFM) tapping mode images were collected with a Multimedia Nanoscope IIIa AFM (Digital instrument/Veeco-Metrology Group). The AFM tips had resonant frequencies close to 300 kHz.

1. Y. Ni, R. Rulkens, I. Manners, *J. Am. Chem. Soc.* 1996, **118**, 4102.
2. K. Temple, J.A. Massey, Z. Chen, N. Vaidya, A. Berenbaum, M.D. Foster, I. Manners, *J. Inorg. Organomet. Polym.* 1999, **9**, 189.
